# Inbreeding parents should invest more resources in fewer offspring

A. Bradley Duthie<sup>1,\*</sup>, Aline M. Lee<sup>1</sup>, Jane M. Reid<sup>1</sup>,

**1 Institute of Biological and Environmental Sciences, School of Biological Sciences, Zoology Building, Tillydrone Avenue, University of Aberdeen, Aberdeen AB24 2TZ, United Kingdom**

\* [aduthie@abdn.ac.uk](mailto:aduthie@abdn.ac.uk), [brad.duthie@gmail.com](mailto:brad.duthie@gmail.com)

## Abstract

Inbreeding increases parent-offspring relatedness and commonly reduces offspring viability, potentially affecting selection on reproductive interactions involving relatives and associated parental investment. Separate bodies of theory predict selection for inbreeding versus inbreeding avoidance, and selection for optimal parental investment. We unify inbreeding and parental investment theory, demonstrating that these separate bodies can be interpreted as special cases within a broader inclusive fitness framework. We show that optimal investment per offspring increases when parents inbreed and hence produce inbred offspring with lower viability. Offspring viability is buffered by parental investment, but the total number of offspring that a parent produces is reduced due to an intrinsic trade-off between parental investment and offspring production. Optimal parental investment does not depend on whether a focal female is herself inbred. However, inbreeding causes optimal parental investment to increase even further given strict monogamy and associated biparental investment as opposed to female-only investment. Our model implies that understanding the evolutionary dynamics of inbreeding strategy, inbreeding depression, and parental investment requires joint measurement and understanding of the expression of each in relation to the other, and we demonstrate an intrinsic link between inbreeding and parental investment that may widely affect the evolution of behaviour and intra-familial conflict.

## Introduction

Natural selection is a universal biological process by which inherited traits are preserved within populations if they increase an individual's lifetime reproductive success, which classically defines individual fitness (Darwin, 1859; Dawkins, 1982). Inclusive fitness theory (Hamilton, 1964a,b) provides a key extension to this classical definition of fitness, recognising that natural selection will more generally act on individual phenotypes to maximise the rate of increase of replica allele copies (Grafen, 2006). Inclusive fitness accounts for both an individual's own reproductive success and that of relatives who share identical-by-descent alleles. It provides key evolutionary insights (Gardner and West, 2014), perhaps most iconically explaining self-sacrificial behaviour by appealing to the increased reproductive success of related beneficiaries (Hamilton, 1964a), and identifying causes of conflict between parents and offspring over parental investment (hereafter 'PI'; Trivers, 1972, 1974).

It is less widely appreciated that individuals can increase the reproductive success of their relatives by inbreeding, and that selection for inbreeding tolerance or preference can therefore occur despite decreased viability of inbred offspring (i.e., “inbreeding depression”, hereafter ‘ID’; [Parker, 1979](#)). Inclusive fitness theory pertaining to inbreeding has focused solely on individuals’ decisions to inbreed or avoid inbreeding, assuming no concurrent modulation of PI or offspring production (e.g., [Parker, 2006](#); [Kokko and Ots, 2006](#); [Duthie and Reid, 2015](#)). Such theory ignores that inbreeding might affect a parent’s opportunity to increase offspring viability through PI. If individuals decrease total offspring production to invest more per offspring, then they might be able to mitigate ID. Because inbreeding also increases parent-offspring relatedness, inclusive fitness accrued for each viable inbred offspring produced should thereby increase. Unification of inbreeding and PI theory should therefore lead to general predictions for how selection will affect both critical components of reproductive strategy.

Biparental inbreeding theory has been developed primarily from a basic inclusive fitness model, wherein a focal parent encounters a focal relative and chooses to either inbreed or avoid inbreeding with them (e.g., [Parker, 1979, 2006](#); [Kokko and Ots, 2006](#); [Duthie and Reid, 2015](#)). If the focal parent inbreeds, then the viability of resulting offspring decreases (ID), but the offspring will inherit additional copies of the focal parent’s alleles from the parent’s related mate. The focal parent can thereby increase its inclusive fitness by inbreeding if the number of identical-by-descent alleles in its inbred offspring exceeds that of outbred offspring after accounting for ID. The magnitude of ID below which inbreeding rather than avoiding inbreeding increases a parent’s inclusive fitness is sex-specific, assuming that females are resource limited and therefore always produce a fixed number of offspring, while male reproduction is limited only by mating opportunities (i.e., stereotypical sex roles). Under such conditions, females that inbreed can only increase their inclusive fitness indirectly by increasing the reproductive success of their male relatives. Conversely, males that inbreed can directly increase their inclusive fitness by increasing their own reproductive success. All else being equal, males but not females therefore benefit by inbreeding given strong ID, while both sexes benefit by inbreeding given weak ID. These predictions are sensitive to the assumption that there is a low or negligible opportunity cost of male mating. If inbreeding instead precludes a male from siring an additional outbred offspring, such as when there is an opportunity cost stemming from monogamy and associated PI, then inbreeding is never beneficial ([Waser et al., 1986](#)). However, existing theory that considers these inclusive fitness consequences of inbreeding assumes that PI is fixed. No theory considers inbreeding decisions in the broader context where PI is optimally expressed.

Similarly, a general framework for PI theory is well-established under outbreeding, but how optimal PI changes when offspring are inbred remains unexplored. Importantly, PI does not simply represent raw resources provided to an offspring (e.g., food), but is rather anything that a parent does to increase its offspring’s viability at the expense of its other actual or potential offspring ([Trivers, 1972, 1974](#)). One key assumption of PI theory is therefore that the degree to which a parent invests in each offspring is directly and inversely related to the number of offspring that it produces. A second key assumption is that offspring viability increases with increasing PI, but with diminishing returns on viability as more PI is provided. Given these two assumptions, the optimal PI for which parent fitness is maximised can be determined, as done to examine the magnitude and evolution of parent-offspring conflict over PI (e.g., [Macnair and Parker, 1978](#); [Parker and Macnair, 1978](#); [Parker, 1985](#); [De Jong et al., 2005](#); [Kuijper and Johnstone, 2012](#)). Such models assume that offspring are outbred (or result from self-fertilisation, [De Jong et al., 2005](#)). However, biparental inbreeding is commonplace in wild populations, directly affecting both offspring viability and parent-offspring relatedness ([O’Grady et al., 2006](#); [Charlesworth and Willis, 2009](#)). Such inbreeding might profoundly affect optimal PI,

yet no theory unifies inbreeding and PI to predict how parents should adjust each to maximise fitness.

Further, fitness consequences of PI and inbreeding might be affected if parents are themselves inbred, or if PI is shared between parents. It is inconsistent to assume that focal parents will always be outbred in a population where the opportunities for inbreeding exist. Inbred parents can carry multiple copies of an identical-by-descent allele, thereby affecting the rate at which the allele's frequency is increased per parent copy through offspring production. Hence the consequences of inbred focal parents on PI and inclusive fitness cannot necessarily be ignored. Additionally, while optimal PI and resulting fitness are not expected to differ between single parent investment and monogamous biparental investment given outbreeding (Parker, 1985), this might not be the case given inbreeding because monogamy entails a mating opportunity cost (Waser et al., 1986) to a focal female's related male. Theory unifying PI and inbreeding must therefore consider consequences for fitness when a focal parent is inbred, and when PI is biparental.

We conceptually unify two well-established but separate theoretical frameworks; the first predicts ID thresholds below which focal parents increase their fitness by inbreeding rather than avoiding inbreeding (Parker, 1979), and the second predicts optimal PI in outbred offspring (Macnair and Parker, 1978). Our specific aims are to show how: (1) optimal PI changes when parents inbreed, and given different magnitudes of ID; (2) optimal PI and parental fitness change when a focal parent is itself inbred; and (3) an inbreeding parent's optimal PI is indirectly affected by opportunity costs when both parents contribute PI. We thereby generate novel predictions that apply to all sexual species.

## Unification of inbreeding and parental investment

We consider a focal diploid parent (hereafter assumed to be a stereotypical female) that can adjust the degree to which she invests in each offspring to maximise her own fitness, defined as the rate at which she increases the number of identical-by-descent allele copies inherited by her offspring per copy that she herself carries (always 1 if she is outbred). This definition differs from previous models of PI (e.g., Macnair and Parker, 1978; Parker and Macnair, 1978), which define fitness as the rate at which offspring are produced and therefore cannot account for inclusive fitness differences between inbred and outbred offspring. We assume that offspring viability increases with increasing PI ( $m$ ), with diminishing returns as  $m$  increases (following Parker and Macnair, 1978). Females have a total PI budget of  $M$ , and therefore produce  $n = M/m$  offspring. We assume for simplicity that  $M \gg m$  (following Parker, 1985), but this assumption should not affect our general conclusions. Given these minimal assumptions, we can conceptually unify inbreeding and PI theory through a general framework that predicts the number of identical-by-descent allele copies inherited per viable offspring ( $\zeta_{\text{off}}$ ),

$$\zeta_{\text{off}} = \frac{1}{2} (1 + r) \left( 1 - e^{-c(m - m_{\min} - \beta r)} \right). \quad (1)$$

Our model can be conceptualised in two pieces (parameters are summarised in Table 1). The first expression  $(1/2)(1 + r)$  is the fitness increment that a female gains from identical-by-descent alleles inherited by her offspring, as affected by the coefficient of relatedness between the female and the sire of her offspring ( $r$ ) scaled by  $1/2$  to give each parent's genetic contribution to its offspring. The second expression  $(1 - \exp[-c(m - m_{\min} - \beta r)])$  is the individual offspring's viability as a function of  $m$  and  $r$ . Offspring viability is also affected by a minimum value of  $m$  required for viability to exceed zero ( $m_{\min}$ ), ID ( $\beta$ ), and the shape of the curve relating PI to viability ( $c$ ; i.e.,

how ‘diminishing’ returns in  $\zeta_{\text{off}}$  are with increasing  $m$ ). When a focal female inbreeds, the first expression increases because more identical-by-descent alleles are inherited by inbred offspring, but the second expression decreases if  $\beta > 0$  due to ID. However, increased PI ( $m$ ) can offset ID and thereby increase  $\zeta_{\text{off}}$ .

When  $r = 0$  (outbreeding),  $\beta = 0$  and Eq. 1 reduces to standard models of PI that assume outbreeding (e.g., Macnair and Parker, 1978; Parker and Macnair, 1978), but with the usual parameter  $K$  replaced by  $1/2$ , thereby explicitly representing identical-by-descent alleles instead of an arbitrary constant affecting offspring fitness. Similarly, given  $\delta = \exp[-c(m - m_{\min} - \beta r)]$ , Eq. 1 reduces to standard models of biparental inbreeding that assume PI is fixed, where  $\delta$  defines reduced viability of inbred versus outbred offspring (see Kokko and Ots, 2006; Parker, 2006; Duthie and Reid, 2015). All offspring have equal viability as  $m \rightarrow \infty$ . Consequently, we assume that sufficient PI can always compensate for ID, but key conclusions remain unchanged when this assumption is relaxed (Supporting Information p. S1-2).

**Table 1:** Definitions of key parameters.

| Parameter            | Description                                                  |
|----------------------|--------------------------------------------------------------|
| $M$                  | Female’s total investment budget                             |
| $m$                  | Female’s investment per offspring                            |
| $n$                  | Female’s total offspring production                          |
| $\zeta_{\text{off}}$ | Identical-by-descent allele copies inherited per offspring   |
| $r$                  | Relatedness of a mate to the focal female                    |
| $m_{\min}$           | Minimum parental investment required for offspring viability |
| $\beta$              | Inbreeding depression in offspring viability                 |
| $c$                  | Curve of parental investment with offspring fitness          |
| $\gamma$             | Female’s rate of fitness increase                            |

## Parental investment and fitness given inbreeding

**Figure 1:** (A) Relationship between parental investment ( $m$ ) and the number of identical-by-descent copies of a focal female’s alleles inherited by its offspring ( $\zeta_{\text{off}}$ ) for females that outbreed (solid curve) and females that inbreed with a first order relative (dashed curve). Tangent lines identify optimal parental investment, and their slopes define a female’s rate of fitness increase when outbreeding (solid line) and inbreeding with a first order relative (dashed line). (B) Relationship between the magnitude of inbreeding depression ( $\beta$ ) and optimal parental investment ( $m^*$ ) across four degrees of relatedness ( $r$ ) between a focal female and her mate given  $m_{\min} = 1$  and  $c = 1$ .

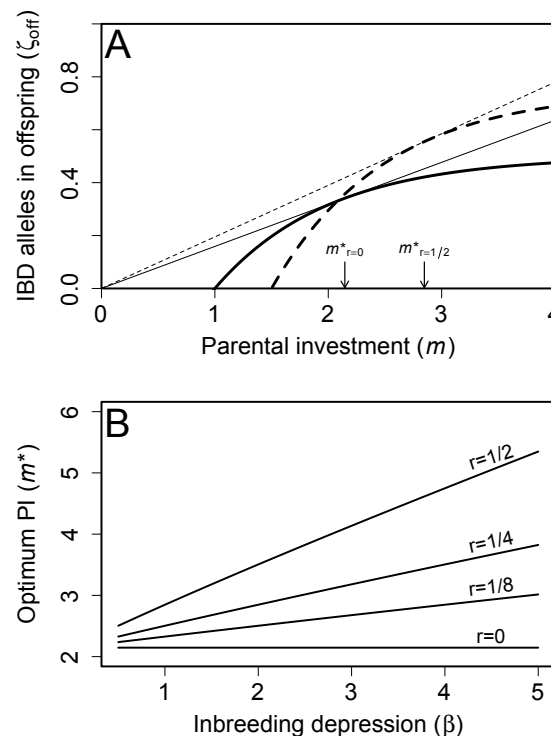

Equation 1 can be analysed to determine optimal PI ( $m^*$ ), and the corresponding rate at which identical-by-descent alleles are inherited by viable offspring given  $m^*$  (Kuijper and Johnstone, 2012), which we define as  $\gamma^*$ . Before analysing Eq. 1 generally, we provide a simple example contrasting outbreeding ( $r = 0$ ) with inbreeding between first order relatives ( $r = 1/2$ ). For simplicity, we assume that  $m_{\min} = 1$ ,  $\beta = 1$ , and  $c = 1$  (see Appendix 1 for sample derivations of  $m^*$  and  $\gamma^*$  under these conditions).

Figure 1A shows how  $\zeta_{\text{off}}$  increases with  $m$  given  $r = 0$  (solid curve) and  $r = 1/2$  (dashed curve). Given  $r = 0$ ,  $\zeta_{\text{off}} = 0$  when  $m \leq m_{\min}$ , meaning that offspring are only viable when  $m > m_{\min}$ . Increasing  $r$  increases the minimum amount of PI required to produce a

viable offspring to  $m_{min} + \beta r$ , so when  $r = 1/2$ ,  $\zeta_{off} = 0$  when  $m \leq 3/2$ . Nevertheless, because inbred offspring inherit more identical-by-descent copies of their parent's alleles, sufficiently high  $m$  causes  $\zeta_{off}$  of inbred offspring to exceed that of outbred offspring (beyond the intersection between the solid and dashed curves in Figure 1A). The point on the line running through the origin that is tangent to  $\zeta_{off}(m)$  defines optimal PI, as Figure 1A shows for outbreeding  $m_{r=0}^* = 2.146$  (solid line) and inbreeding with a first order relative  $m_{r=1/2}^* = 2.847$  (dashed line). The slope of each tangent line is the rate of a female's fitness increase given optimal PI given outbreeding  $\gamma_{r=0}^* = 0.159$  and first order inbreeding  $\gamma_{r=1/2}^* = 0.195$ . To maximise fitness, females that inbreed with first order relatives should therefore invest more in offspring than females that outbreed ( $m_{r=1/2}^* > m_{r=0}^*$ ). This result is general across different values of  $r$  (see Appendix 2); as  $r$  increases, so does  $m^*$ . Given the trade-off between  $m$  and  $n$ , females that inbreed more should therefore invest more per capita in fewer total offspring.

A general relationship between  $\beta$  and  $m^*$  for different values of  $r$  can be determined numerically. Figure 1B shows this relationship across a range of  $\beta$  for  $r$  values corresponding to outbreeding ( $r = 0$ ) and inbreeding between outbred third-order ( $r = 1/8$ ), second-order ( $r = 1/4$ ), and first-order ( $r = 1/2$ ) relatives. Overall, Figure 1B shows how  $m^*$  increases with increasing  $\beta$  and  $r$ , and that the difference in magnitude of investment per offspring is often expected to be high for females that inbreed rather than outbreed (e.g., when  $\beta = 3.25$ , optimal PI doubles,  $m_{r=1/2}^* \approx 2m_{r=0}^*$ ).

**Figure 2:** Relationship between the magnitude of inbreeding depression ( $\beta$ ) and the rate of a focal female's fitness increase ( $\gamma$ ) across four degrees of relatedness ( $r$ ) between a focal female and her mate assuming that focal females (A) invest optimally given the degree to which they inbreed and (B) invest at the optimum for outbreeding.

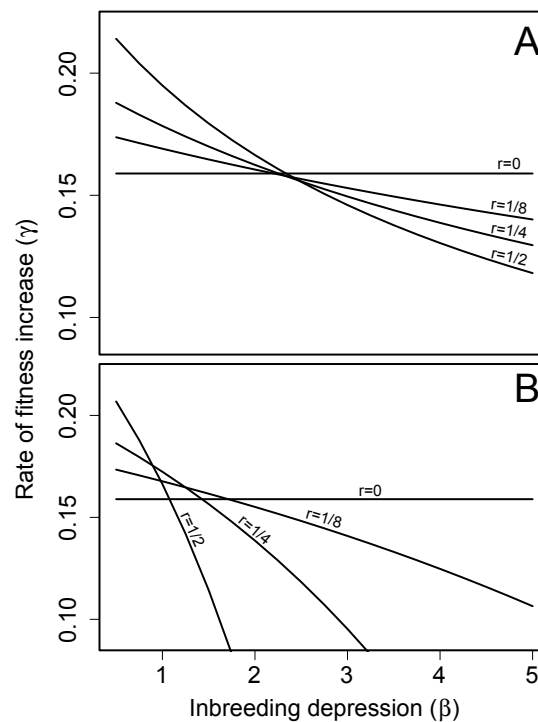

Assuming that females allocate PI optimally, their  $\gamma^*$  values can be compared across different values of  $r$  and  $\beta$ . For example, given  $r = 0$  and  $r = 1/2$  when  $\beta = 1$ , females that inbreed increase their fitness more than females that outbreed when both invest optimally ( $\gamma_{r=1/2}^* > \gamma_{r=0}^*$ ). This result concurs with biparental inbreeding models where PI does not vary (see Appendix 3). However, if  $\beta = 3$ , then  $\gamma_{r=0}^* = 0.159$  and  $\gamma_{r=1/2}^* = 0.146$ . Given this higher  $\beta$ , females that outbreed will therefore have higher fitness than females that inbreed with first order relatives. Figure 2A shows more generally how  $\gamma^*$  changes with  $\beta$  and  $r$  given optimal PI. Across all  $\beta$ , the highest  $\gamma^*$  occurs either when  $r = 1/2$  ( $\beta < 2.335$ ) or  $r = 0$  ( $\beta > 2.335$ ), and never for intermediate values of  $r$ . If females can invest optimally, it is therefore beneficial to either maximise or minimise

inbreeding, depending on the magnitude of ID.

In some populations, individuals might be unable to discriminate between relatives and non-relatives, and hence unable to adjust their PI when inbreeding. We therefore consider a focal female's inclusive fitness when she cannot adjust her PI to  $m^*$  upon inbreeding, and therefore  $\gamma < \gamma^*$ . Figure 2B shows  $\gamma$  values for females that inbreed to different degrees when they invest at the relatively low optimum  $m^*$  of outbreeding females. When inbreeding females allocate PI as if they are outbreeding,  $\gamma$  always



decreases, and this fitness decrease becomes more severe with increasing  $r$ . While the fitness of a female that inbreeds with a first order relative ( $r = 1/2$ ) exceeds that of an outbreeding females when  $\beta < 2.335$ , if the inbreeding female invests at the outbreeding female's optimum, then her fitness is higher only when  $\beta < 1.079$ . Consequently, if parents are unable to recognise that they are inbreeding and adjust their PI accordingly, their fitness might be decreased severely relative to optimally investing parents.

### Investment and fitness of an inbred parent

Our initial assumption that a focal female is herself outbred is likely to be violated in populations where inbreeding is expected to occur (Duthie and Reid, 2015). We therefore consider how the degree to which a focal female is herself inbred will affect her optimal PI ( $m^*$ ) and rate of increase in fitness ( $\gamma^*$ ).

**Figure 3:** Relationship between parental investment ( $m$ ) and the number of identical-by-descent copies of a focal female's alleles that are present in its viable offspring ( $\zeta_{\text{off}}$ ) for females that are outbred ( $f = 0$ ; upper curve) versus females that are inbred ( $f = 1/4$ ; lower curve). Grey shading between the curves shows the fitness difference between outbred and inbred females across different degrees of parental investment, and  $m^*$  indicates optimal parental investment. Thin grey lines in the figure show tangent lines for each curve.

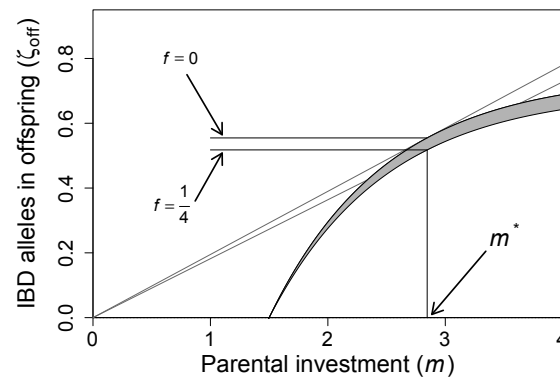

To account for an inbred female, we decompose the coefficient of relatedness  $r$  into the underlying coefficient of kinship  $k$  between the female and her mate and the female's own coefficient of inbreeding  $f$  (see Hamilton, 1972; Michod and Anderson, 1979), such that,

$$r = \frac{2k}{1+f}. \quad (2)$$

The coefficients  $k$  and  $f$  are the probabilities that two homologous alleles randomly sampled from the focal female and her mate, and two homologous alleles within the focal female, are identical-by-descent. The value of  $k$  between two parents therefore defines offspring  $f$ . Because ID is widely assumed to be caused by the expression of homozygous deleterious recessive alleles (Charlesworth and Willis, 2009), the value of  $k$  determines the degree to which ID is expressed in offspring. In contrast, a female's own  $f$  does not directly affect the degree to which homologous deleterious recessive alleles will be expressed in offspring, and therefore does not contribute to ID. To understand how  $\zeta_{\text{off}}$  is affected by  $f$  and  $k$ , and thereby relax the assumption that a focal female is outbred, we expand Eq. 1,

$$\zeta_{\text{off}} = \frac{1}{2} \left( 1 + \frac{2k}{1+f} \right) \left( 1 - e^{-c(m-m_{\min}-2\beta k)} \right). \quad (3)$$

Because a focal female's  $f$  does not affect ID in its offspring, and instead only affects the fitness increment  $1/2(1 + 2k/[1+f])$ ,  $m^*$  is unaffected by  $f$  (see also Appendix 2). The degree to which a female is herself inbred therefore does not affect optimal PI (Fig. 3).

Further, a focal female's  $f$  should only slightly affect  $\gamma^*$ , and only if  $k > 0$ . For example, Fig. 3 shows the difference between  $\zeta_{\text{off}}(m)$  for females that are outbred ( $f = 0$ , top curve) versus inbred ( $f = 1/4$ , i.e., whose parents were outbred first-order relatives, bottom curve) when each pairs with a first order relative ( $k = 1/4$ ). Where  $m = m^*$ ,  $\zeta_{\text{off}}$  is slightly higher for outbred females, meaning that  $\gamma^*$  is higher for outbred females than for inbred females even though optimal PI is the same ( $m_{f=0}^* = m_{f=1/4}^*$ ). Overall, Fig 3 shows a weak effect on  $\gamma^*$  across a relatively wide range of  $f$  (outbred individuals versus individuals of full sibling matings). Consequently, the degree to which an individual is inbred will have a small effect on its rate of fitness increase, and no effect on its optimal PI.

## Effects of biparental investment

**Figure 4:** Assuming strict monogamy, the (A) relationship between parental investment and the proportion of a focal female’s identical-by-descent alleles that are present in its viable offspring for females that outbreed ( $r = 0$ ; solid curve) and females that inbreed with first order relatives ( $r = 1/2$ ; dashed curve). Tangent lines identify optimal parental investment, and their slopes define a female’s rate of fitness increase ( $\gamma$ ) when outbreeding (solid line) and inbreeding (dashed line). (B) Relationship between the magnitude of inbreeding depression and optimal parental investment across four degrees of relatedness between a focal female and her mate.

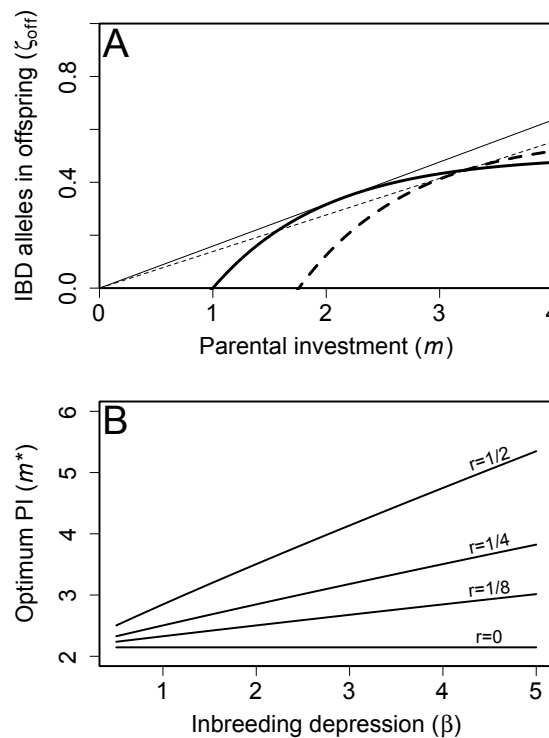

Our initial model assumed that only females provide PI. We now consider the opposite extreme, where PI is provided by two parents that pair exactly once in life and therefore have completely overlapping fitness interests (i.e., strict monogamy; Parker, 1985). Given Parker’s (1985) implicit assumption of outbreeding, optimal PI per parent ( $m^*$ ) does not differ between female-only PI versus monogamy, but twice as many offspring are produced due to the doubled total investment budget  $2M$ . However,  $m^*$  given monogamy will differ from  $m^*$  given female-only PI if monogamous parents are related. This is because a male is by definition precluded from mating with another female, and therefore pays a complete opportunity cost for inbreeding (Waser et al., 1986). A focal female will thereby lose any inclusive fitness increment that she would have otherwise received when her related

mate also bred with other females.

To incorporate this cost, we explicitly consider both the direct and indirect fitness consequences of inbreeding. We assume that if a focal female avoids inbreeding with her male relative, then that relative will outbreed instead, and that parents are outbred ( $f = 0$ ) and invest optimally for any given  $\beta$ . We define  $m_0^*$  and  $m_r^*$  as optimal investment for outbreeding and for inbreeding to the degree  $r$ , respectively. Therefore, if a focal female avoids inbreeding,

$$\zeta_{off} = \frac{1}{2} \left( 1 - e^{-c(m_0^* - m_{min})} \right). \quad (4)$$

If she instead inbreeds,

$$\zeta_{off} = \frac{1}{2} (1 + r) \left( 1 - e^{-c(m_r^* - m_{min} - \beta r)} \right) - \frac{r}{2} \left( 1 - e^{-c(m_0^* - m_{min})} \right). \quad (5)$$

The first term of Eq. 5 represents the fitness increment the focal female receives from inbreeding (and is identical to the right-hand side of Eq. 1). The second term represents the indirect loss of fitness the focal female would have received through her male relative had she not inbred with him. The resulting decrease in  $\zeta_{off}(m_r)$  causes an overall increase in  $m_r^*$ . Monogamous parents should therefore each invest even more per offspring when inbreeding than females should invest given female-only PI (assuming a male would otherwise have outbred). For example, if  $r = 1/2$  and  $\beta = 1$ ,  $m_r^* = 3.191$  given strict monogamy but 2.847 given female-only PI (Fig. 4A). However, a parent’s rate of fitness increase at  $r = 1/2$  is  $\gamma_{r=1/2}^* = 0.195$  given female-only PI versus  $\gamma_{r=1/2}^* = 0.138$  given strict monogamy. The latter is therefore less than the increase resulting from optimal PI given outbreeding,  $\gamma_{r=0}^* = 0.159$ . Indeed, given strict monogamy,  $\gamma_{r=1/2}^* < \gamma_{r=0}^*$  for all

$\beta$ , meaning that the rate of fitness increase accrued from inbreeding never exceeds that accrued from outbreeding.

Figure 4A shows how  $\zeta_{\text{off}}$  increases as a function of  $m$  given  $r = 0$  (solid curve) and  $r = 1/2$  (dashed curve) given strict monogamy and biparental investment, and can be compared to analogous relationships for female-only PI, given identical parameter values shown in Fig. 1A. In contrast to female-only PI,  $\gamma_{r=1/2}^*$  (slope of the dashed line) is now lower when  $r = 1/2$  than when  $r = 0$ , meaning that the fitness of females that inbreed with first order relatives is lower than females that outbreed given strict monogamy. Figure 4B shows  $m^*$  for two strictly monogamous parents across different values of  $r$  and  $\beta$ . In comparison with female-only PI (Fig. 1B),  $m^*$  is always slightly higher given strict monogamy if  $r > 0$  (Fig. 4B), but in both cases  $m^*$  increases with increasing  $r$  and  $\beta$ .

**Figure 5:** Assuming strict monogamy, the relationship between the magnitude of inbreeding depression ( $\beta$ ) and the rate of a focal female's fitness increase ( $\gamma$ ) across four degrees of relatedness ( $r$ ) between a focal female and her mate given that (A) focal females invest optimally given their degree of inbreeding, and (B) females invest at the optimum for outbreeding.

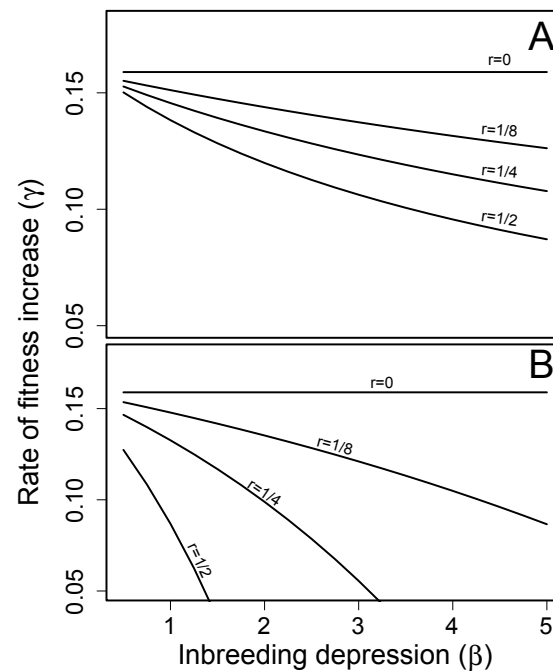

from outbreeding, inbreeding will never be beneficial (Waser et al., 1986; Duthie and Reid, 2015). However, if relatives become paired under strict monogamy, each should invest more per offspring than given female-only PI.

## Discussion

Inbreeding increases parent-offspring relatedness and commonly reduces offspring viability, potentially affecting selection on reproductive interactions involving relatives and associated parental investment (PI), and thereby altering evolutionary dynamics of entire reproductive systems. By unifying biparental inbreeding theory and PI theory under an inclusive fitness framework, we show that when females inbreed and hence produce inbred offspring, optimal PI always increases, and this increase is greatest when inbreeding depression in offspring viability (ID) is strong. We also show that, in contrast to existing theory that implicitly assumes outbreeding (Parker, 1985), optimal PI increases given strict monogamy and associated biparental investment compared to female-only PI. Finally, we show that optimal PI does not change when a focal female is herself inbred, but her fitness, defined as the rate of increase of identical-by-descent

We now consider the inclusive fitness of focal parents that cannot adjust their PI upon inbreeding, and instead allocates PI at the optimum for outbreeding. Figure 5A shows how  $\gamma$  varies with  $\beta$  given that monogamous parents invest optimally (5A) and invest at an optimum PI for outbreeding (5B). In contrast to female-only PI (Fig. 2A),  $\gamma^*$  is always maximised at  $r = 0$ , meaning that inbreeding never increases fitness. Fitness decreases even further when inbreeding individuals allocate PI at  $m^*$  for outbreeding (compare Figs. 2B and 5B; see Supporting Information p. S1-5 for  $\gamma$  values across  $\beta$  and  $r$  assuming parents invest at different  $m_r^*$ ). Universally decreasing  $\gamma$  with increasing  $r$  is consistent with biparental inbreeding theory, which demonstrates that if inbreeding with a female completely precludes a male



allele copies, decreases. Our conceptual synthesis illustrates how previously separate theory developed for biparental inbreeding (Parker, 1979, 2006) and PI (Macnair and Parker, 1978; Parker and Macnair, 1978) can be understood as special cases within a broader inclusive fitness framework in which inbreeding and PI covary in predictable ways.

## Inbreeding and PI in empirical systems

Theory can inform empirical hypothesis testing by logically connecting assumptions to novel empirical predictions. We demonstrate that given a small number of assumptions regarding PI and inbreeding, selection will increase PI (and therefore decrease the total number of offspring parents produce) with increasing relatedness between parents and increasing magnitude of ID (Fig. 1B). Empirical studies are now needed to test key assumptions and predictions.

One assumption is that ID can be reduced by PI. Numerous studies have estimated magnitudes of ID in components of offspring fitness (Charlesworth and Willis, 2009; Szulkin et al., 2013). However, PI is notoriously difficult to measure because it might encompass numerous behaviours, each involving allocation from an unknown total PI budget (Parker et al., 2002). It is therefore difficult to quantify how much ID is reduced by PI, and only a few empirical studies make such estimates. For example, Pilakouta et al. (2015) quantified the fitness of inbred and outbred burying beetle (*Nicrophorus vespilloides*) offspring in the presence and absence of maternal care, finding that maternal care increased survival of inbred offspring relatively more than outbred offspring. Interpreting care as a component of PI, this result concurs with the assumption that PI can reduce ID. Similarly, in the subsocial spider *Anelosimus* cf. *jucundus*, in which care is provided by solitary females, Avilés and Bukowski (2006) found evidence of ID only late in an offspring's life when parental care was no longer being provided, and hypothesise that care might buffer ID. However, *A.* cf. *jucundus* that inbred did not produce fewer offspring than females that outbred, as our model predicts if females respond to inbreeding by increasing PI. Some further constraint might therefore prevent female *A.* cf. *jucundus* from adaptively adjusting PI.

Indeed, a second assumption of our model is that individuals can discriminate among different kin and non-kin and adjust their PI according to the degree to which they inbreed. If parents are unable to infer that they are inbreeding, then will likely allocate PI sub-optimally, resulting in decreased fitness of inbreeding parents (Fig. 2B) and viability of resulting inbred offspring. The magnitude of ID might consequently be greater than if PI were allocated optimally, implying that observed ID depends partly on adaptive PI rather than being a fixed consequence of offspring genotype. To our knowledge, no empirical studies have explicitly tested whether or not PI varies with inbreeding. However, strong negative correlations between inbreeding and litter size have been found in wolves (*Canis lupus*; Liberg et al., 2005; Fredrickson et al., 2007). Wolves are highly social and generally monogamous, and are likely able to discriminate among kin (Räikkönen et al., 2009; Geffen et al., 2011). Liberg et al. (2005) and Fredrickson et al. (2007) interpret decreased litter size as a negative fitness consequence of inbreeding manifested as increased early mortality of inbred offspring. Our model suggests an alternative explanation; smaller litter sizes might partially reflect adaptive allocation whereby inbreeding parents invest more in fewer offspring. Future empirical assessments of the relative contributions of ID and adjusted PI in shaping offspring viability will require careful observation of variation in PI and litter or brood sizes in systems with natural or experimental variation in inbreeding.

Our model also clarifies why reproductive success, simply measured as the number of offspring produced, does not necessarily reflect inclusive fitness given inbreeding, or hence predict evolutionary dynamics. A female that produces an outbred brood

might have lower inclusive fitness than a female that produces an inbred brood of the same (or slightly smaller) size if the inbreeding female's viable offspring carry more identical-by-descent allele copies (see also Reid et al., *in press*). Interestingly, if brood size is restricted by some physiological or external constraint (i.e., brooding or nest site capacity), our model predicts that females with large total resource budgets  $M$  might benefit by inbreeding and thereby adaptively allocate more PI to each offspring. Overall, therefore, our model shows that understanding the evolutionary dynamics of reproductive systems that involve interactions among relatives is likely to require ID, inbreeding strategy, and reproductive output to be evaluated in the context of variable PI.

## Intrafamilial conflict given inbreeding

Interactions over PI are characterised by intrafamilial conflict between parents, between parents and offspring, and among siblings (Parker et al., 2002). Our general theoretical framework sets up future considerations of intrafamilial conflict over PI given inbreeding. Our current model assumes either female-only PI or strict monogamy, meaning that female and male fitness interests are identical, eliminating sexual conflict. However, in general, if both parents invest and are not completely monogamous, sexual conflict is predicted because each parent will increase its fitness if it provides less PI than its mate. Optimal PI can then be modelled as an evolutionary stable strategy (Smith, 1977), and is expected to decrease for both parents (Parker, 1985). This decrease in optimal PI might be weaker given inbreeding because the negative inclusive fitness consequences of a focal parent reducing PI will be exacerbated if the mate that it abandons is a relative.

Sexual conflict might also be minimised if a focal parent that decreases its PI must wait for another mate to become available before it can mate again. Kokko and Ots (2006) considered the fitness consequences of inbreeding and inbreeding avoidance given a waiting time between mate encounters, and a processing time following mating, which they interpreted as PI. They found that inbreeding tolerance generally increased with increasing waiting time, but that such relationships depended on processing time. However, processing time was a fixed parameter, meaning that parents could not adjust PI as a consequence of inbreeding. If this assumption was relaxed such that PI could vary, parents that inbreed might be expected to increase their time spent processing offspring before attempting to mate again.

Parent-offspring conflict is a focal theoretical interest of many PI models, which generally predict that offspring benefit from PI that exceeds parental optima (e.g., Macnair and Parker, 1978; Parker and Macnair, 1978; Parker, 1985; De Jong et al., 2005). However, such conflict might be decreased by inbreeding. Inbreeding parents are more closely related to their offspring than are outbreeding parents, generating the increase in parents' optimal PI in our model; in the extreme case where  $r = 1$  (self-fertilisation), no conflict over PI should exist. De Jong et al. (2005) modelled PI conflict in the context of optimal seed mass from the perspective of parent plants and their seeds given varying rates of self-fertilisation, showing that conflict over seed mass decreases with increasing self-fertilisation, assuming seed mass is controlled by seeds rather than parent plants. They predict that conflict over seed mass decreases with increasing self-fertilisation rate, and a comparative analysis of seed size across closely related plant species generally supports this prediction (De Jong et al., 2005). In general, the same principles of parent-offspring conflict are expected to apply for biparental inbreeding; parent-offspring conflict should decrease with increasing inbreeding, and reduced conflict might in turn affect offspring behaviour. For example, Matthey (2014) observed both increased parental care and decreased offspring begging in an experimental study of *N. vispilloides* when offspring were inbred. A reduction in begging behaviour is consistent with our model when inbreeding increases and parent-offspring fitness interests with respect to PI are

more closely aligned. Future models could relax our assumption that parents completely control PI, and thereby consider how biparental inbreeding and PI interact to affect the evolution of reproductive strategies given intrafamilial conflict.

## Acknowledgments

This work was funded by a European Research Council Starting Grant to JMR. We thank Greta Bocedi, Ryan Germain, and Matthew Wolak for helpful comments.

## Appendix 1: Sample derivations of $m^*$ and $\gamma^*$

In general, the equation for a line tangent to some function  $f$  at the point  $a$  is,

$$y = f'(a)(x - a) + f(a). \quad (6)$$

In the above,  $f'(a)$  is the first derivative of  $f(a)$ , and  $y$  and  $x$  define the point of interest through which the straight line will pass that is also tangent to  $f(a)$ . The original function that defines  $\zeta_{\text{off}}$  is as follows,

$$\zeta_{\text{off}} = \frac{1}{2} (1 + r) \left( 1 - e^{-c(m - m_{\min} - \beta r)} \right). \quad (7)$$

Differentiating  $\zeta_{\text{off}}$  with respect to  $m$ , we have the following,

$$\frac{\partial \zeta_{\text{off}}}{\partial m} = \frac{c}{2} (1 + r) e^{-c(m - m_{\min} - \beta r)}. \quad (8)$$

Substituting  $\zeta_{\text{off}}(m)$  and  $\partial \zeta_{\text{off}} / \partial m$  and setting  $y = 0$  and  $x = 0$  (origin), we have the general equation,

$$0 = \frac{c}{2} (1 + r) e^{-c(m - m_{\min} - \beta r)} (0 - m) + \frac{1}{2} (1 + r) \left( 1 - e^{-c(m - m_{\min} - \beta r)} \right). \quad (9)$$

A solution for  $m^*$  can be obtained numerically for the example in which  $m_{\min} = 1$ ,  $\beta = 1$ , and  $c = 1$ . If  $r = 0$ ,  $m_{r=0}^* = 2.146$ , and if  $r = 1/2$ ,  $m_{r=1/2}^* = 2.847$ . Solutions for the slopes defining  $\gamma_{r=0}^*$  and  $\gamma_{r=1/2}^*$  can be obtained by finding the straight line that runs through the two points  $(0, 0)$  and  $(m^*, \zeta_{\text{off}}(m^*))$ . In the case of  $r = 0$ ,  $\zeta_{\text{off}}(m^*) = 0.341$ , so we find,  $\gamma_{r=0}^* = (0.341 - 0) / (2.146 - 0) = 0.159$ . In the case of  $r = 1/2$ ,  $\zeta_{\text{off}}(m^*) = 0.555$ , so we find,  $\gamma_{r=1/2}^* = (0.555 - 0) / (2.847 - 0) = 0.195$ .

## Appendix 2: $m^*$ increases with increasing $r$

Here we show that optimal parental investment always increases with increasing inbreeding given ID and  $c > 0$ . First, note that  $m^*$  is defined as the value of  $m$  that maximises the rate of increase in  $\zeta_{\text{off}}$  for a female. This is described by the line that passes through the origin and lies tangent to  $\zeta_{\text{off}}(m)$ . As in Appendix 1, we have the general equation for which  $m = m^*$ ,

$$0 = \frac{c}{2} (1 + r) e^{-c(m - m_{\min} - \beta r)} (0 - m) + \frac{1}{2} (1 + r) \left( 1 - e^{-c(m - m_{\min} - \beta r)} \right). \quad (10)$$

We first substitute  $m = m^*$  and note that this equation reduces to,

$$0 = c e^{-c(m^* - m_{\min} - \beta r)} (0 - m^*) + \left( 1 - e^{-c(m^* - m_{\min} - \beta r)} \right). \quad (11)$$

This simplification dividing both sides of the equation by  $(1/2)(1 + r)$  has a biological interpretation that is relevant to PI. Optimal PI does not depend directly on the uniform

increase in  $\zeta_{\text{off}}$  caused by  $r$  in  $(1/2)(1+r)$ , the change in  $m^*$  is only affected by  $r$  insofar as  $r$  affects offspring fitness directly through ID.

$$0 = -m^* c e^{-c(m^* - m_{\min} - \beta r)} + 1 - e^{-c(m^* - m_{\min} - \beta r)} \quad (12)$$

From the above,  $r$  can be isolated,

$$r = \frac{1}{\beta} \left( m^* - m_{\min} + \frac{1}{c} \ln \left( \frac{1}{(1 + m^* c)} \right) \right) \quad (13)$$

We now differentiate  $r$  with respect to  $m^*$ ,

$$\frac{\partial r}{\partial m^*} = \frac{m^* c}{\beta (m^* c + 1)}. \quad (14)$$

By applying the chain rule, we can thereby arrive at the general conclusion,

$$\frac{\partial m^*}{\partial r} = \frac{\beta (m^* c + 1)}{m^* c}. \quad (15)$$

Given the above,  $\partial m^* / \partial r > 0$  assuming  $\beta > 0$  (ID),  $c > 0$  (offspring fitness increases with PI), and  $m^* > 0$  (optimum PI is positive). These assumptions are biologically realistic; we therefore conclude that the positive association between optimal PI ( $m^*$ ) and inbreeding ( $r$ ) is general. As inbreeding increases, so should optimal PI in offspring.

### Appendix 3: Consistency with biparental inbreeding models

It is trivial to show that a female that inbreeds with a first order relative ( $r = 1/2$ ) has a higher fitness than a female that outbreeds ( $r = 0$ ) given  $m_{\min} = 1$ ,  $\beta = 1$ , and  $c = 1$  at optimal values of  $m_{r=1/2}^*$  and  $m_{r=0}^*$ . To do this, we define  $\delta_r$  as follows,

$$\delta_r = e^{-c(m_r^* - m_{\min} - \beta r)}. \quad (16)$$

In biparental inbreeding models (e.g., [Kokko and Ots, 2006](#); [Parker, 2006](#); [Duthie and Reid, 2015](#)), it is assumed that  $\delta_{r=0} = 0$  for outbred offspring, but this is not the case in our model because  $\delta_{r=0}$  will also depend on parental investment. Fitness from inbreeding to any degree  $r$  can be determined by,

$$W_r = \frac{n}{2} (1 + r) (1 - \delta_r). \quad (17)$$

By definition,  $n = M/m$ , so  $n$  is the total number of offspring a female produces. Biparental inbreeding models assume that this value is constant, but  $n$  will scale linearly with  $m$  because females that invest more in each offspring (high  $m$ ) will produce fewer total offspring (low  $n$ ). To account for this, we can simply substitute  $M/m$  for  $n$  to scale for offspring produced,

$$W_r = \frac{M}{2m} (1 + r) (1 - \delta_r). \quad (18)$$

Fitness given  $r = 0$  and  $r = 1/2$ , and  $m_{r=0}^*$  and  $m_{r=1/2}^*$ , can be determined by substituting some constant value for  $M$  (here for simplicity, assume  $M = 1$ ), as the magnitude of  $n$  will not affect relative fitness differences.

To show that inbreeding with first order relatives returns a higher fitness than outbreeding given the above conditions assumed in our model, we can use the above equation directly to compare the fitness given both  $r = 1/2$  and  $r = 0$ , noting that  $\delta_{r=1/2} = 0.26$  and  $\delta_{r=0} = 0.32$  (note that  $\delta_{r=1/2} < \delta_{r=0}$  because inbreeding parents are investing more in their offspring,  $m_{r=1/2}^* = 2.847$  versus  $m_{r=0}^* = 2.146$ ). Consequently, we can use the above equation to show that the fitness gain of an optimally investing female that inbreeds with a first order relative is 0.195, compared with 0.159 for the outbreeding female; these values are identical to our earlier calculated values of  $\gamma_{r=1/2}^*$  and  $\gamma_{r=0}^*$ .

## References

- Avilés, L., and T. C. Bukowski. 2006. Group living and inbreeding depression in a subsocial spider. *Proceedings of the Royal Society B* 273:157–163.
- Charlesworth, D., and J. H. Willis. 2009. The genetics of inbreeding depression. *Nature Reviews Genetics* 10:783–796.
- Crnokrak, P., and D. A. Roff. 1999. Inbreeding depression in the wild. *Heredity* 83:260–270.
- Darwin, C. 1859. *The Origin of Species*. Penguin, New York.
- Dawkins, R. 1982. *The Extended Phenotype*. Revised ed ed. Oxford University Press, Oxford.
- De Jong, T. J., H. Van Dijk, and P. G. L. Klinkhamer. 2005. Hamilton's rule, imprinting and parent-offspring conflict over seed mass in partially selfing plants. *Journal of Evolutionary Biology* 18:676–682.
- Duthie, A. B., and J. M. Reid. 2015. What happens after inbreeding avoidance? Inbreeding by rejected relatives and the inclusive fitness benefit of inbreeding avoidance. *PLoS One* 10:e0125140.
- Fredrickson, R. J., P. Siminski, M. Woolf, and P. W. Hedrick. 2007. Genetic rescue and inbreeding depression in Mexican wolves. *Proceedings of The Royal Society B* 274:2365–2371.
- Gardner, A., and S. A. West. 2014. Inclusive fitness: 50 years on. *Philosophical Transactions of the Royal Society B* 369:20130356.
- Geffen, E., M. Kam, R. Hefner, P. Hersteinsson, A. Angerbjörn, L. Dalèn, E. Fuglei, K. Norèn, J. R. Adams, J. Vucetich, T. J. Meier, L. D. Mech, B. M. Vonholdt, D. R. Stahler, and R. K. Wayne. 2011. Kin encounter rate and inbreeding avoidance in canids. *Molecular Ecology* 20:5348–5358.
- Grafen, A. 2006. Optimization of inclusive fitness. *Journal of Theoretical Biology* 238:541–563.
- Hamilton, W. D. 1964*a*. The genetical evolution of social behaviour. I. *Journal of Theoretical Biology* 7:1–16.
- . 1964*b*. The genetical evolution of social behaviour. II. *Journal of Theoretical Biology* 7:17–52.
- . 1972. Altruism and related phenomena, mainly in social insects. *Annual Review of Ecology and Systematics* 3:193–232.
- Kokko, H., and I. Ots. 2006. When not to avoid inbreeding. *Evolution* 60:467–475.
- Kuijper, B., and R. A. Johnstone. 2012. How dispersal influences parent-offspring conflict over investment. *Behavioral Ecology* 23:898–906.
- Liberg, O., H. Andrén, H.-C. Pedersen, H. Sand, D. Sejberg, P. Wabakken, M. Kesson, and S. Bensch. 2005. Severe inbreeding depression in a wild wolf (*Canis lupus*) population. *Biology letters* 1:17–20.
- Macnair, M. R., and G. A. Parker. 1978. Models of parent-offspring conflict. II. Promiscuity. *Animal Behaviour* 26:111–122.
- Mattey, S. N. 2014. Social effects of inbreeding associated with parental care. Ph.D. thesis. University of Edinburgh.
- Michod, R. E., and W. W. Anderson. 1979. Measures of genetic relationship and the concept of inclusive fitness. *American Naturalist* 114:637–647.



- O'Grady, J. J., B. W. Brook, D. H. Reed, J. D. Ballou, D. W. Tonkyn, and R. Frankham. 2006. Realistic levels of inbreeding depression strongly affect extinction risk in wild populations. *Biological Conservation* 133:42–51.
- Parker, G. A. 1979. Sexual selection and sexual conflict. Pages 123–166 *in* M. S. Blum and N. A. Blum, eds. *Sexual selection and reproductive competition in insects*. Academic Press, Inc, New York.
- . 1985. Models of parent-offspring conflict. V. Effects of the behaviour of the two parents. *Animal Behaviour* 33:519–533.
- . 2006. Sexual conflict over mating and fertilization: an overview. *Philosophical Transactions of the Royal Society B* 361:235–259.
- Parker, G. A., and M. R. Macnair. 1978. Models of parent-offspring conflict. I. Monogamy. *Animal Behaviour* 26:97–110.
- Parker, G. A., N. J. Royle, and I. R. Hartley. 2002. Intrafamilial conflict and parental investment: a synthesis. *Philosophical Transactions of the Royal Society B* 357:295–307.
- Pilakouta, N., S. Jamieson, J. A. Moorad, and P. T. Smiseth. 2015. Parental care buffers against inbreeding depression in burying beetles. *Proceedings of the National Academy of Sciences* 112:201500658.
- Räikkönen, J., J. A. Vucetich, R. O. Peterson, and M. P. Nelson. 2009. Congenital bone deformities and the inbred wolves (*Canis lupus*) of Isle Royale. *Biological Conservation* 142:1025–1031.
- Smith, J. M. 1977. Parental investment: A prospective analysis. *Animal Behaviour* 25:1–9.
- Szulkin, M., K. V. Stopher, J. M. Pemberton, and J. M. Reid. 2013. Inbreeding avoidance, tolerance, or preference in animals? *Trends in Ecology & Evolution* 28:205–211.
- Trivers, R. 1972. Parental investment and sexual selection. Chap. 7, pages 136–179 *in* B. Campbell, ed. *Sexual Selection and the Descent of Man, 1871-1971*. Heinemann, London.
- . 1974. Parent-Offspring Conflict. *American Zoologist* 14:249–264.
- Waser, P. M., S. N. Austad, and B. Keane. 1986. When should animals tolerate inbreeding? *American Naturalist* 128:529–537.
